# Supplementary material for: Targeted-Capture Next-Generation Sequencing in Diagnosis Approach of Pediatric Cholestasis
Source: MDPI journal article supplement (doi:10.3390/diagnostics12051169), 2022-05-07
Supplement: s1 [file s1]

# Supplementary Materials

## **Figure S1: Details and dates of use of the 4 genes panels**

### **Version 1: From January 2015 to November 2016**

ABCB11, ABCB4, ABCC2, ABCG5/ABCG8, ACAD9, ACAMD, ACADS, ACADVL, AGL, AIRE, AKR1D1, ALDOB, AMACR, ATOX1, ATP7B, ATP8B1, BAAT, BCS1L, C10orf2, CCBE1, CFC1, CFTR, CIRH1A, CLDN1, CLDN6, CLDN9, COMMD1, CPT1A, CPT1B, CPT2, CYP27A1, CYP7A1, CYP7B1, DGUOK, DLD, ETFA, ETFB, ETFDH, FARS2, FBP1, G6PC, GALT, GBE1, GFM1, GPBAR1, GYG1, GYS1, HADHA, HADHB, HADHSC, HAMP, HFE, HJV, HMGCL, HMGCS2, HSD17B4, HSD3B7, JAG1, KEAP1, KRT18, KRT8, LPIN1, LPIN2, MPV17, MYO5B, NFE2L2, NOTCH2, NR1H4, OCLN, OXCT1, PHKA2, PHKB, PHKG2, PKD1, PKD2, POLG, PYGL, RAB11A, RDX, RFNG, SCO1, SERPINA1, SI, SLC22A5, SLC25A13, SLC25A20, SLC27A5, SLC2A2, SLC2A5, SLC37A4, SLC40A1, SLC5A1, SLCO1B1/SLCO1B3, TALDO1, TFR2, TJP2, TRMU, TUFM, UGT1A1, VIL1, VIPAS39, VPS33B.

### **Version 2: From December 2016 to February 2018**

ABCB11, ABCB4, ABCC2, ABCG5/ABCG8, ABCD3, ADK, AGL, AIRE, AKR1D1, ALDOB, AMACR, AQP8, ATOX1, ATP7B, ATP8B1, BAAT, BCS1L, C10orf2, CCBE1, CFC1, CFTR, CIRH1A, CLDN1, CLDN6, CLDN9, COMMD1, CPT1A, CTC1, CYP27A1, CYP7A1, CYP7B1, DCDC2, DGUOK, DKC1, DLD, EPHX1, FAH, FARS2, FBP1, GAA, GALE, GALT, GBE1, GFM1, GPBAR1, GYG1, GYS2, HMGCL, HMGCS2, HNF1A, HNF1B, HSD17B4, HSD3B7, JAG1, KCNN3, KEAP1, KRT18, KRT8, LFNG, MFNG, MPV17, MYO5B, NBAS, NOTCH1, NOTCH2, NR1H4, OCLN, OXCT1, PHKA2, PHKB, PHKG2, PKHD1, POGLUT1, POLG, PRKCSH, PRSS1, PYGL, RAB11A, RDX, RFNG, RTEL1, SCO1, SEC63, SERAC1, SI, SKIV2L, SLC10A1, SLC10A2, SLC25A13, SLC27A5, SLC2A2, SLC2A5, SLC30A10, SLC4A2, SLC40A1, SLC5A1, SLCO1B1/SLCO1B3, SPINK1, TALDO1, TEM30C, TERC, TERT, TJP2, TRMU, TTC37, TUFM, UGT1A1, VEPH1, VIL1, VIPAS39, VPS33B.

### **Version 3: From Mars to April 2019**

ABCB11, ABCB4, ABCC2, ABCG5/ABCG8, ABCD3, ACOX2, AGL, AIRE, AKR1D1, ALDOB, AMACR, AQP8, ATP7B, ATP8B1, BAAT, CCBE1, CFTR, CIRH1A, CPT1A, CTC1, CYP27A1, CYP7A1, CYP7B1, DCDC2, DGUOK, DKC1, DLD, EPHX1, FAH, FBP1, FOPV, FUT2, GALE, GALT, GATA6, GBE1, GFM1, GPBAR1, GYG1, GYS2, HMGCL, HMGCS2, HSD17B4, HSD3B7, IARS, IFT140, IFT172 (IFTB *cpsant*), JAG1, KCNN3, LARS, LFNG, MFNG, MPV17, MYO5B, NBAS, NOTCH1, NOTCH2, NR1H4, OXCT1, PHKA2, PHKB, PHKG2, PKHD1, POGLUT1, POLG, PPP1R15B, PRKCSH, PYGL, RAB11A, RDX, RFNG, RTEL1, SCO1, SCYL1, SEC63, SI, SKIV2L, SLC10A1, SLC10A2, SLC25A13, SLC27A5, SLC2A2, SLC2A5, SLC4A2, SLC5A1, SLCO1B1/SLCO1B3, TALDO1, TEM30C, TERC, TERT, TJP2, TRMU, TTC37, TUFM, UGT1A1, UNC45A, VEPH1, VIL1, VIPAS39, VPS33B.

### **Version 4: From April 2019 to October 2020**

ABCB11, ABCB4, ABCC2, ABCG5, ABCG8, ABCD3, ACOX2, AGL, AIRE, AKR1D1, ALDOB, AMACR, AQP8, ATP7B, ATP8B1, BAAT, CCBE1, CFTR, CIRH1A, CPT1A, CTC1, CYP27A1, CYP7A1, CYP7B1, DCDC2, DGUOK, DKC1, DLD, EPHX1, FAH, FBP1, FOPV, FUT2, GALE, GALT, GATA6, GBE1, GFM1, GPBAR1, GYG2, GYS2, HNF1A, HNF1B, HMGCL, HMGCS2, HSD17B4, HSD3B7, IARS, IFT140, IFT172 (IFTB *cpsant*), JAG1, KCNN3, LARS, LFNG, MARS, MFNG, MPV17, MYO5B, NBAS, NOTCH1, NOTCH2, NR1H4, OXCT1, PHKA2, PHKB, PHKG2, PKHD1, POGLUT1, POLG, PPP1R15B, PRKCSH, PYGL, RAB11A, RDX, RFNG, RTEL1, SCO1, SCYL1, SEC63, SI, SKIV2L, SLC10A1, SLC10A2, SLC25A13, SLC27A5, SLC2A2, SLC2A5, SLC4A2, SLC5A1, SLCO1B1, SLCO1B3, TALDO1, TEM30C, TERC, TERT, THBS2, TKFC, TJP2, TRMU, TTC37, TUFM, UGT1A1, UNC45A, VEPH1, VIL1, VIPAS39, VPS33B.

**Table S1.** Genotype of patients with certain diagnosis (ranged in alphabetic order, regarding the disease).

| Patient | Gene            | Status | HGVS                                                                  | Conclusion        | Additional molecular findings                |
|---------|-----------------|--------|-----------------------------------------------------------------------|-------------------|----------------------------------------------|
| 62      | <i>SERPINA1</i> | Ho     | c.1096G>A:p.Glu366Lys                                                 | A1AT deficiency   | ABCB4: p.Arg590Gln (He)                      |
| 63      | <i>SERPINA1</i> | Ho     | c.1096G>A:p.Glu366Lys                                                 | A1AT deficiency   |                                              |
| 64      | <i>SERPINA1</i> | Ho     | c.1096G>A:p.Glu366Lys                                                 | A1AT deficiency   | ABCB4:p.Thr775Met (He)                       |
| 65      | <i>SERPINA1</i> | Ho     | c.1096G>A:p.Glu366Lys                                                 | A1AT deficiency   |                                              |
| 66      | <i>SERPINA1</i> | Ho     | c.1096G>A:p.Glu366Lys                                                 | A1AT deficiency   |                                              |
| 67      | <i>NOTCH2</i>   | He     | c.6007C>T: p.Arg2003Ter                                               | Alagille syndrome |                                              |
| 68      | <i>NOTCH2</i>   | He     | <b>c.5983_5984del:p.Leu1995ValfsTer29</b>                             | Alagille syndrome |                                              |
| 69      | <i>NOTCH2</i>   | He     | c.4699C>T:p.Arg1567Trp                                                | Alagille syndrome |                                              |
| 70      | <i>NOTCH2</i>   | He     | <b>c.4084_4096del:p.Ser1362AlafsTer61</b>                             | Alagille syndrome |                                              |
| 71      | <i>NOTCH2</i>   | He     | <b>c.6806G&gt;T:p.Gly2269Trp</b>                                      | Alagille syndrome |                                              |
| 72      | <i>NOTCH2</i>   | He     | <b>c.1282G&gt;T:p.Glu428Ter</b>                                       | Alagille syndrome | ABCB4:p.Arg590Gln (He)                       |
| 73      | <i>NOTCH2</i>   | He     | <b>c.1276C&gt;T:p.Pro426Ser</b>                                       | Alagille syndrome |                                              |
| 74      | <i>JAG1</i>     | He     | <b>c.2455A&gt;G:p.Ile819Val</b>                                       | Alagille syndrome |                                              |
| 75      | <i>JAG1</i>     | He     | <b>c.702C&gt;A:p.Cys234Ter</b>                                        | Alagille syndrome |                                              |
| 76      | <i>JAG1</i>     | He     | c.2122_2125del:p.Gln708ValfsTer34                                     | Alagille syndrome |                                              |
| 77      | <i>JAG1</i>     | He     | <b>c.1304dupA:p.Tyr435Ter</b>                                         | Alagille syndrome |                                              |
| 78      | <i>JAG1</i>     | He     | c.2122_2125del:p.Gln708ValfsTer34                                     | Alagille syndrome |                                              |
| 79      | <i>JAG1</i>     | He     | c.2230C>T:p.Arg744Ter                                                 | Alagille syndrome |                                              |
| 80      | <i>JAG1</i>     | He     | <b>c.1856_1857del: p.Lys619ArgfsTer9</b>                              | Alagille syndrome |                                              |
| 81      | <i>JAG1</i>     | He     | <b>c.2899A&gt;T:p.Lys967Ter</b>                                       | Alagille syndrome |                                              |
| 82      | <i>JAG1</i>     | He     | c.2033delA:p.Asn678MetfsTer65                                         | Alagille syndrome | MYO5B:p.Tyr559Ter (He),<br>p.Leu1216Arg (He) |
| 83      | <i>JAG1</i>     | He     | <b>c.2018_2021dup:p.Asn674fsLysTer16</b>                              | Alagille syndrome |                                              |
| 84      | <i>JAG1</i>     | He     | c.439C>T:p.Gln147Ter                                                  | Alagille syndrome |                                              |
| 85      | <i>JAG1</i>     | He     | c.439+1G>A:p.(?)                                                      | Alagille syndrome |                                              |
| 86      | <i>JAG1</i>     | He     | <b>c.754del:p.Arg252GlyfsTer160</b>                                   | Alagille syndrome |                                              |
| 87      | <i>JAG1</i>     | He     | <b>c.1165dupT: p.Cys389LeufsTer6</b>                                  | Alagille syndrome |                                              |
| 88      | <i>JAG1</i>     | He     | <b>c.3226_3227del:p.Val1076LeufsTer32</b>                             | Alagille syndrome |                                              |
| 89      | <i>JAG1</i>     | He     | Complete deletion of the gene                                         | Alagille syndrome | Confirmed by MLPA                            |
| 90      | <i>JAG1</i>     | He     | c.1313G>A:p.Cys438Tyr                                                 | Alagille syndrome |                                              |
| 91      | <i>JAG1</i>     | He     | <b>c.407_408delinsCT:p(?)</b>                                         | Alagille syndrome |                                              |
| 92      | <i>JAG1</i>     | He     | <b>c.695-2del:p(?)</b>                                                | Alagille syndrome |                                              |
| 93      | <i>JAG1</i>     | He     | c.delexon16_26:p(?)                                                   | Alagille syndrome | Confirmed by MLPA                            |
| 94      | <i>JAG1</i>     | He     | c.488C>G:p.Pro163Arg                                                  | Alagille syndrome |                                              |
| 95      | <i>JAG1</i>     | He     | c.551G>A:p.Arg184His                                                  | Alagille syndrome |                                              |
| 96      | <i>JAG1</i>     | He     | Complete deletion of the gene                                         | Alagille syndrome |                                              |
| 97      | <i>JAG1</i>     | He     | <b>c.1899dupT:p.Glu634_Ser635delinsTer</b>                            | Alagille syndrome |                                              |
| 98      | <i>JAG1</i>     | He     | c.551G>A:p.Arg184His                                                  | Alagille syndrome |                                              |
| 99      | <i>JAG1</i>     | He     | c.1977G>A:p.Trp659Ter                                                 | Alagille syndrome |                                              |
| 100     | <i>JAG1</i>     | He     | <b>c.286T&gt;C:p.Ser96Pro</b>                                         | Alagille syndrome |                                              |
| 101     | <i>JAG1</i>     | He     | c.2321G>A:p.Trp774Ter                                                 | Alagille syndrome | ABCB11 : p.Asp843His (He)                    |
| 102     | <i>JAG1</i>     | He     | c.269_270delinsG :p.Gly90Valfs                                        | Alagille syndrome |                                              |
| 103     | <i>JAG1</i>     | He     | <b>c.635G&gt;C:p.Cys212Ser</b>                                        | Alagille syndrome |                                              |
| 104     | <i>JAG1</i>     | He     | <b>c.446_449del:p.Asp149Valfs*11</b>                                  | Alagille syndrome |                                              |
| 105     | <i>JAG1</i>     | He     | <b>c.886G&gt;T:p.Asp296Tyr</b>                                        | Alagille syndrome |                                              |
| 106     | <i>JAG1</i>     | He     | <b>c.764A&gt;G:p.Tyr255Cys</b>                                        | Alagille syndrome |                                              |
| 107     | <i>JAG1</i>     | He     | c.2230C>T:p.Arg744Ter                                                 | Alagille syndrome |                                              |
| 108     | <i>JAG1</i>     | He     | <b>c.107A&gt;G:p.Glu36Gly (LP)/<br/>c.185G&gt;C:p.Gly62Ala (VOUS)</b> | Alagille syndrome |                                              |
| 109     | <i>JAG1</i>     | He     | <b>c.409dupG:p.Glu137Glyfs*160</b>                                    | Alagille syndrome |                                              |
| 110     | <i>JAG1</i>     | He     | Complete deletion of the gene                                         | Alagille syndrome |                                              |
| 111     | <i>JAG1</i>     | He     | c.1485_1486del :p.Cys496PhefsTer9                                     | Alagille syndrome |                                              |
| 112     | <i>JAG1</i>     | He     | <b>c.92_98del:p.Ala31Valfs*13</b>                                     | Alagille syndrome |                                              |
| 113     | <i>JAG1</i>     | He     | <b>c.1264dupG:p.Val422Glyfs*7</b>                                     | Alagille syndrome |                                              |
| 114     | <i>JAG1</i>     | He     | <b>c.640C&gt;T:p.Gln214Ter</b>                                        | Alagille syndrome | ABCB4: Ala934Thr He (father)                 |
| 115     | <i>JAG1</i>     | He     | <b>c.2572+1G&gt;A: p.(?)</b>                                          | Alagille syndrome |                                              |
| 116     | <i>JAG1</i>     | He     | <b>c.1499delG:p.Gly500Valfs*64</b>                                    | Alagille syndrome |                                              |
| 117     | <i>JAG1</i>     | He     | c.2732G>T:p.Cys911Phe                                                 | Alagille syndrome |                                              |

|     |        |      |                                                                          |                                 |                         |
|-----|--------|------|--------------------------------------------------------------------------|---------------------------------|-------------------------|
| 118 | JAG1   | He   | c.2840dupA:p.Cys948Valfs*4                                               | Alagille syndrome               |                         |
| 119 | JAG1   | He   | c.2828C>T:p.Pro943Leu                                                    | Alagille syndrome               |                         |
| 120 | JAG1   | He   | c.82-1G>A: p.(?)                                                         | Alagille syndrome               |                         |
| 121 | JAG1   | He   | c.439C>T:p.Gln147Ter                                                     | Alagille syndrome               |                         |
| 122 | VPS33B | Ho   | c.989delA:p.(?)                                                          | ARC syndrome                    |                         |
| 123 | VPS33B | Ho   | c.1148T>A:p.Ile383Asn                                                    | ARC syndrome                    |                         |
| 124 | VPS33B | CHe  | c.1246C>T; p.Arg416Ter<br>c.1714T>G:p.Phe572Val                          | ARC syndrome                    |                         |
| 125 | VPS33B | Ho   | c.1148T>A:p.Ile383Asn                                                    | ARC syndrome                    |                         |
| 126 | VPS33B | Ho   | c.1160T>G:p.Ile387Arg                                                    | ARC syndrome                    |                         |
| 127 | ATP8B1 | Ho   | c.1982T>C:p.Ile661Thr                                                    | BRIC1                           |                         |
| 128 | ABCB11 | CHe  | c.1460G>A:p.Arg487His<br>c.2495G>A:p.Arg832His                           | BRIC2                           |                         |
| 129 | ABCB11 | He   | c.2095T>C:p.Ser699Pro                                                    | BRIC2                           |                         |
| 130 | ABCB11 | CHe  | c.23G>A:p.Arg8Gln;<br>c.3628A>C:p.Thr1210Pro                             | BRIC2                           |                         |
| 131 | AKR1D1 | Ho   | c.242A>T:p.Asp81Val                                                      | Bile acid synthesis defect      |                         |
| 132 | UGT1A1 | Ho   | c.720-730del :p.Arg240SerfsTer14                                         | Criggler Najjar                 |                         |
| 133 | CFTR   | CHe  | c.349C>T:p.Arg117Cys<br>c.2052delA: p.Lys684AsnfsTer38                   | Cystic fibrosis                 |                         |
| 134 | CFTR   | CHe  | c.3909C>G:p.Asn1303Lys<br>c.4054C>T:p.Gln1352Ter                         | Cystic fibrosis                 |                         |
| 135 | CFTR   | Ho   | c.1520_1522del; p.Phe508del                                              | Cystic fibrosis                 |                         |
| 136 | ABCC2  | Ho   | c.974C>G:p.Ser325Ter                                                     | Dubin-Johnson syndrome          |                         |
| 137 | ABCC2  | Ho   | c.1609_1611del:p.Leu537del                                               | Dubin-Johnson syndrome          |                         |
| 138 | ABCC2  | 2 He | c.2358delC:p.Leu788CysfsTer8<br>c.2901C>A:p.Tyr967Ter                    | Dubin-Johnson syndrome          |                         |
| 139 | ABCC2  | CHe  | c.1291delC: p.Leu431SerfsTer4<br>c.3918_3919insGTGCG:p.Tyr1309CysfsTer45 | Dubin-Johnson syndrome          | ABCB11:p.Gln466Lys (He) |
| 140 | ABCC2  | Ho   | c.2362_2363del:p.788_788del                                              | Dubin-Johnson syndrome          | ABCB11:p.Asn591Ser (He) |
| 141 | ABCC2  | Ho   | c.4120C>T:p.Arg1374Ter                                                   | Dubin-Johnson syndrome          |                         |
| 142 | ABCC2  | CHe  | c.298C>T:p.Arg100Ter<br>c.2997G>A:p.Trp999Ter                            | Dubin-Johnson syndrome          |                         |
| 143 | ABCC2  | Ho   | c.3196C>T:p.Arg1066Ter                                                   | Dubin-Johnson syndrome          | CFTR:p.Leu977Phe (He)   |
| 144 | ABCC2  | CHe  | c.1963C>T:p.Arg655Ter<br>c.3928C>T:p.Arg1310Ter                          | Dubin-Johnson syndrome          |                         |
| 145 | ABCC2  | CHe  | c.2388delA:p.Lys797AsnfsTer14<br>c.4438C>T:p.Gln1480Ter                  | Dubin-Johnson syndrome          |                         |
| 146 | ABCC2  | CHe  | c.1216dupT:p.Asp1073Ter<br>c.delexon26_29:p.(?)                          | Dubin-Johnson syndrome          | ABCB4:p.Arg47Gln (He)   |
| 147 | ABCC2  | CHe  | c.974C>G:p.Ser325Ter<br>c.4117C>T:p.Leu1373Phe                           | Dubin-Johnson syndrome          |                         |
| 148 | ABCC2  | Ho   | c.2108A>G:p.Tyr703Cys                                                    | Dubin-Johnson syndrome          |                         |
| 149 | ABCC2  | Ho   | c.1216dupT:p.Asp1073Ter                                                  | Dubin-Johnson syndrome          |                         |
| 150 | ABCC2  | CHe  | c.4210_4212del:p.1404_1404del<br>c.3258+2T>G:p.(?)                       | Dubin-Johnson syndrome          |                         |
| 151 | ABCC2  | CHe  | c.1216dupT:p.Asp1073Ter<br>c.3196C>T:p.Arg1066Ter                        | Dubin-Johnson syndrome          |                         |
| 152 | ABCC2  | Ho   | c.974C>G:p.Ser325Ter                                                     | Dubin-Johnson syndrome          |                         |
| 153 | UGT1A1 | 2he  | c.1091C>T:p.Pro364Leu<br>c.211G>A:p.Gly71Arg                             | Gilbert syndrome                |                         |
| 154 | DCDC2  | Ho   | c.256delT:p.Tyr86fs                                                      | Neonatal sclerosing cholangitis |                         |

|     |               |          |                                                                   |                                    |                       |
|-----|---------------|----------|-------------------------------------------------------------------|------------------------------------|-----------------------|
| 155 | <i>DCDC2</i>  | CHe      | <b>c.184G&gt;T:p.Val62Phe<br/>c.del-exon1:p.(?)</b>               | Neonatal sclerosing<br>cholangitis | Confirmed by qPCR     |
| 156 | <i>DCDC2</i>  | CHe      | <b>c.193dupA:p.Ile65Asnfs*50<br/>c.del-exon5:p.(?)</b>            | Neonatal sclerosing<br>cholangitis | Confirmed by qPCR     |
| 157 | <i>DCDC2</i>  | ho       | <b>c.122T&gt;A:p.Val41Glu</b>                                     | Neonatal sclerosing<br>cholangitis |                       |
| 158 | <i>DCDC2</i>  | Ho       | <b>c.293+96_294del:p.Asn98LysfsTer2</b>                           | Neonatal sclerosing<br>cholangitis |                       |
| 159 | <i>DCDC2</i>  | Ho       | <b>c.122T&gt;A:p.Val41Glu</b>                                     | Neonatal sclerosing<br>cholangitis |                       |
| 160 | <i>DCDC2</i>  | CHe      | <b>c.543C&gt;A:p.Ser181Arg<br/>c.715T&gt;G:p.Ser239Ala</b>        | Neonatal sclerosing<br>cholangitis |                       |
| 161 | <i>DCDC2</i>  | Ho<br>Ho | <b>c.276A&gt;T; p.Glu92Asp<br/>c.229C&gt;G;p.Leu77Val</b>         | Neonatal sclerosing<br>cholangitis |                       |
| 162 | <i>DCDC2</i>  | Ho       | <b>c.122T&gt;A:p.Val41Glu</b>                                     | Neonatal sclerosing<br>cholangitis |                       |
| 163 | <i>ATP8B1</i> | CHe      | c.2600G>A :p.Arg867His<br>c.782-12T>G: p(?)                       | PFIC1                              | CFTR:p.Arg117His (He) |
| 164 | <i>ABCB11</i> | Ho       | c.1409G>A:p.Arg470Gln                                             | PFIC2                              |                       |
| 165 | <i>ABCB11</i> | Ho       | c.1062T>A :p.Tyr354Ter                                            | PFIC2                              |                       |
| 166 | <i>ABCB11</i> | Ho       | c.3766-2A>T:p.(?)                                                 | PFIC2                              |                       |
| 167 | <i>ABCB11</i> | Ho       | c.1827_1828insCA:p.Ile610GlnfsTer45                               | PFIC2                              |                       |
| 168 | <i>ABCB11</i> | Ho       | c.677C>T:p.Ser226Leu                                              | PFIC2                              |                       |
| 169 | <i>ABCB11</i> | CHe      | c.3491delT:p.Val1164GlyfsTer7<br>c.890A>G :p.Glu297Gly            | PFIC2                              |                       |
| 170 | <i>ABCB11</i> | Ho       | c.2125G>A:p.Glu709Lys                                             | PFIC2                              |                       |
| 171 | <i>ABCB11</i> | CHe      | c.1159C>T:p.Arg387Cys<br>c.2594C>T:p.Ala865Val                    | PFIC2                              |                       |
| 172 | <i>ABCB11</i> | CHe      | c.2125G>A:p.Glu709Lys<br>c.3148C>T:p.Arg1050Cys                   | PFIC2                              |                       |
| 173 | <i>ABCB11</i> | Ho       | c.3637G>A:p.Gly1213Arg                                            | PFIC2                              |                       |
| 174 | <i>ABCB11</i> | CHe      | c.2931delA:p.Ala978ProfsTer29<br>c.T1062A:p.Tyr354Ter             | PFIC2                              |                       |
| 175 | <i>ABCB11</i> | CHe      | c.1459C>T:p.Arg487Cys<br>c.1392dupA:p.Leu465ThrfsTer9             | PFIC2                              |                       |
| 176 | <i>ABCB11</i> | Ho       | c.3892G>A:p.Gly1298Arg                                            | PFIC2                              |                       |
| 177 | <i>ABCB11</i> | Ho       | c.2494C>T:p.Arg832Cys                                             | PFIC2                              |                       |
| 178 | <i>ABCB11</i> | CHe      | c.2594C>T:p.Ala865Val<br>c.1159C>T:p.Arg387Cys                    | PFIC2                              |                       |
| 179 | <i>ABCB11</i> | CHe      | c.2177_218+1delins:p.(?)<br>c.dup_exon14-28:p(?)                  | PFIC2                              | Confirmed by qPCR     |
| 180 | <i>ABCB11</i> | Ho       | c.1827_1828insCA:p.Ile610GlnfsTer45                               | PFIC2                              |                       |
| 181 | <i>ABCB11</i> | Ho       | c.677C>T:p.Ser226Leu                                              | PFIC2                              |                       |
| 182 | <i>ABCB11</i> | Ho       | c. 3400C>T:p.Gln1134Ter                                           | PFIC2                              |                       |
| 183 | <i>ABCB4</i>  | CHe      | c.2860G>A:p.Gly954Ser<br><b>c.760G&gt;A:p.Ala254Thr</b>           | PFIC3                              |                       |
| 184 | <i>ABCB4</i>  | CHe      | c.139C>T :p.Arg47Ter<br>c :1712delT :p.Val571AspfsTer16           | PFIC3                              |                       |
| 185 | <i>ABCB4</i>  | Ho       | <b>c.2906G&gt;A:p.Arg969His</b>                                   | PFIC3                              |                       |
| 186 | <i>ABCB4</i>  | CHe      | <b>c.2301dupT:p.Thr768TyrfsTer26</b><br>c.2800G>A:p.Ala934Thr     | PFIC3                              |                       |
| 187 | <i>ABCB4</i>  | CHe      | c.430C>T:p.Arg144Ter<br>c.1769G>A p.Arg590Gln* (10,11)            | PFIC3                              |                       |
| 188 | <i>ABCB4</i>  | Ho       | c.79A>G:p.Ser27Gly                                                | PFIC3                              |                       |
| 189 | <i>ABCB4</i>  | CHe      | c.2800G>A:p.Ala934Thr<br><b>c.2932T&gt;C: p.Ser978Pro</b>         | PFIC3                              |                       |
| 190 | <i>ABCB4</i>  | CHe      | <b>c.1778C&gt;A ; p.Thr593Lys<br/>c.3409C&gt;T ; p.Arg1137Trp</b> | PFIC3                              |                       |
| 191 | <i>ABCB4</i>  | Ho       | <b>c.3650T&gt;C:p.Leu1217Pro</b>                                  | PFIC3                              |                       |
| 192 | <i>ABCB4</i>  | CHe      | <b>c.2704A&gt;G:p.Asn902Asp</b><br>c.delexon9_10:p.(?)            | PFIC3                              |                       |
| 193 | <i>ABCB4</i>  | Ho       | <b>c.1894-1G&gt;T:p.(?)</b>                                       | PFIC3                              |                       |

|     |              |            |                                                                                                |                                                                        |                                        |
|-----|--------------|------------|------------------------------------------------------------------------------------------------|------------------------------------------------------------------------|----------------------------------------|
| 194 | <i>ABCB4</i> | CHe        | c.2132T>C:p.Phe711Ser<br>c.delexon10_13:p.( ?)                                                 | PFIC3                                                                  | ABCB11 : c.1139delT:p.Leu380fs<br>(He) |
| 195 | <i>ABCB4</i> | Ho         | <b>c.425delC:p.( ?)</b>                                                                        | PFIC3                                                                  |                                        |
| 196 | <i>ABCB4</i> | Ho         | <b>c.1529A&gt;C:p.Asn510Thr</b>                                                                | PFIC3                                                                  |                                        |
| 197 | <i>ABCB4</i> | Ho         | <b>c.2545T&gt;C:p.Ser849Pro</b>                                                                | PFIC3                                                                  |                                        |
| 198 | <i>ABCB4</i> | CHe        | c.2800G>A:p.Ala934Thr<br>c.1348_1353del:p.450_451del                                           | PFIC3                                                                  |                                        |
| 199 | <i>ABCB4</i> | Ho         | c.101C>T :p.Thr34Met                                                                           | PFIC3                                                                  |                                        |
| 200 | <i>TJP2</i>  | Ho         | <b>c.1594G&gt;C p.Gly532Arg</b>                                                                | PFIC4                                                                  |                                        |
| 201 | <i>TJP2</i>  | CHe        | <b>c.2556delC :p.Leu853PhefsTer8</b><br>c.delexon1_16:p.( ?)                                   | PFIC4                                                                  |                                        |
| 202 | <i>TJP2</i>  | CHe        | <b>c.3283C&gt;T:p.Gln1095Ter</b><br>c.dupexon5_17: p.( ?)                                      | PFIC4                                                                  |                                        |
| 203 | <i>TJP2</i>  | Ho         | <b>c.784G&gt;T:p.Glu262Ter</b>                                                                 | PFIC4                                                                  |                                        |
| 204 | <i>TJP2</i>  | Ho         | <b>c.C847T:p.Glu283Ter</b>                                                                     | PFIC4                                                                  |                                        |
| 205 | <i>TJP2</i>  | CHe        | <b>c.1249G&gt;C:p.Glu417Gln</b><br><b>c.1383_1386del:p.461_462del</b>                          | PFIC4                                                                  |                                        |
| 206 | <i>TJP2</i>  | Ho         | <b>c.953-1G&gt;C:p.( ?)</b>                                                                    | PFIC4                                                                  |                                        |
| 207 | <i>TJP2</i>  | Ho         | <b>c.1894C&gt;T:p.Arg632Ter</b>                                                                | PFIC4                                                                  |                                        |
| 208 | <i>NR1H4</i> | CHe        | c.526C>T:p.Arg176Ter<br><b>c.1180+2T&gt;C:p.( ?)</b>                                           | PFIC5                                                                  |                                        |
| 209 | <i>MYO5B</i> | CHe        | <b>c.731T&gt;A:p.Leu244Ter</b><br><b>c.1207G&gt;A:p.Ala403Thr</b>                              | Myosin 5b<br>deficiency related<br>cholestasis (in<br>absence of MVID) |                                        |
| 210 | <i>MYO5B</i> | Ho         | c.356A>G:p.Tyr119Cys                                                                           | Myosin 5b<br>deficiency related<br>cholestasis (in<br>absence of MVID) |                                        |
| 211 | <i>MYO5B</i> | CHe        | c.1135C>T:p.Arg379Cys (mother)<br>c.1906-2A>G:p.(?) (mother)<br>c.2470C>T:p.Arg824Cys (father) | Myosin 5b<br>deficiency related<br>cholestasis (in<br>absence of MVID) |                                        |
| 212 | <i>MYO5B</i> | CHe        | c.274C>T:p.Arg92Cys<br><b>c.283G&gt;A:p.Glu95Lys</b>                                           | Myosin 5b<br>deficiency related<br>cholestasis (in<br>absence of MVID) |                                        |
| 213 | <i>MYO5B</i> | CHe        | c.2395C>T:p.Arg799Trp<br>c.delexon2_27:p.( ?)                                                  | Myosin 5b<br>deficiency related<br>cholestasis (in<br>absence of MVID) |                                        |
| 214 | <i>MYO5B</i> | CHe        | <b>c.1675T&gt;C:p.Tyr559His</b><br><b>c.860A&gt;G:p.Tyr287Cys</b>                              | Myosin 5b<br>deficiency related<br>cholestasis (in<br>absence of MVID) |                                        |
| 215 | <i>MYO5B</i> | CHe        | c.274C>T:p.Arg92Cys<br>c.2395C>T:p.Arg799Trp                                                   | Myosin 5b<br>deficiency related<br>cholestasis (in<br>absence of MVID) |                                        |
| 216 | <i>MYO5B</i> | 3He        | c.1925T>C:p.Leu642Pro<br>c.1499T>C:p.Ile500Thr                                                 | Myosin 5b<br>deficiency related<br>cholestasis (in<br>absence of MVID) |                                        |
| 217 | <i>MYO5B</i> | Ho         | c.2470C>T : p.Arg824Cys                                                                        | Myosin 5b<br>deficiency related<br>cholestasis (in<br>absence of MVID) |                                        |
| 218 | <i>MYO5B</i> | CHe<br>CHe | <b>MYO5B:c.5323delA:p.Ile1775PhefsTer2</b><br><b>MYO5B:c.274C&gt;T:p.Arg92Cys</b>              | Myosin 5b<br>deficiency related                                        |                                        |

|     |                     |      |                                                                               |                                                               |                  |
|-----|---------------------|------|-------------------------------------------------------------------------------|---------------------------------------------------------------|------------------|
|     |                     |      | <b>ATP8B1:c.163C&gt;T :p.Arg55Trp</b><br><b>ATP8B1:c.134A&gt;C:p.Asn45Thr</b> | cholestasis (in<br>absence of MVID)<br>and/or PFIC1           |                  |
| 219 | CYP27A1             | Ho   | c.446+1G>A :p(?)                                                              | Cerebrotendinous<br>xanthomatosis                             |                  |
| 220 | ACOX2               | Ho   | <b>c.461_464del:p.Thr154fs</b>                                                | Primary bile acid<br>synthesis defect                         |                  |
| 221 | ACOX2               | Ho   | <b>c.73G&gt;A:p.Glu25Lys</b>                                                  | Primary bile acid<br>synthesis defect                         |                  |
| 222 | BAAT                | Ho   | <b>c.1205T&gt;A:p.Ile402Asn</b>                                               | Primary bile acid<br>synthesis defect<br>(conjugation defect) |                  |
| 223 | SLCO1B1/<br>SLCO1B3 | Ho   | Complete deletion of both genes                                               | Rotor syndrome                                                | CGHArray checked |
| 224 | SCYL1               | CHe  | <b>c.2352_2353insGA:p.Arg784fs</b><br><b>c.1386+1G&gt;A:p(?)</b>              | Spinocerebellar<br>ataxia                                     |                  |
| 225 | SCYL1               | Ho   | <b>c.129_130del:p.Ser44HisfsTer5</b>                                          | Spinocerebellar<br>ataxia                                     |                  |
| 226 | SCYL1               | Ho   | <b>c.1346_1347del:p.Thr449SerfsTer13</b>                                      | Spinocerebellar<br>ataxia                                     |                  |
| 227 | TTC37               | 2 He | <b>c.4514T&gt;C:p.Leu1505Ser</b><br><b>c.3015-1G&gt;A:p(?)</b>                | Tricho-hepato-<br>enteric syndrome                            |                  |
| 228 | ATP7B               | CHe  | c.Exon 1 deletion<br><b>c.2495A&gt;C:p.Lys832Thr</b>                          | Wilson disease                                                |                  |
| 229 | ATP7B               | Ho   | c.3008C>T :p.Ala1003Val                                                       | Wilson disease                                                |                  |
| 230 | ATP7B               | CHe  | c.3809A>G:p.Asn1270Ser<br><b>c.366_367insX:p.Ala123delins</b>                 | Wilson disease                                                |                  |

Ho, homozygous, He, heterozygous; CH compound heterozygous, MVID: microvillous inclusion disease. \*The pathogenicity of this variant is supported by previous publications (10,11). Previously unreported variants according to ClinVar® and Varsome® are indicated in bold.

**Table S2.** Main characteristics of 2 patients with PFIC3 and cholangiopathy mimicking neonatal sclerosing cholangitis.

|                                                                             | Patient 188                                                                                                      | Additional patient (unreported in the study)                                   |
|-----------------------------------------------------------------------------|------------------------------------------------------------------------------------------------------------------|--------------------------------------------------------------------------------|
| <b>First diagnosis</b>                                                      | Neonatal sclerosing cholangitis                                                                                  | Neonatal sclerosing cholangitis                                                |
| <b>Liver Histology</b>                                                      | - Peribiliary fibrosis<br>- Few missing intralobular bile ducts<br>- Ductular proliferation<br>- Septal fibrosis | - Cholangitis<br>- Ductopenia<br>- Ductular proliferation<br>- Septal fibrosis |
| <b>Cholangiogram</b>                                                        | Irregular intrahepatic bile ducts (MRI-<br>cholangiography)                                                      | Irregular intrahepatic bile ducts (transhepatic<br>cholescystography)          |
| <b>Genotype ABBC4</b>                                                       | c.79A>G:p.Ser27Gly (Ho)                                                                                          | c.2800G>A:p.Ala934Thr (CHe)<br>c.1348_1353del:p.450_451del (CHe)               |
| <b>Canalicular MDR3<br/>immunostaining</b>                                  | Negative                                                                                                         | Faint                                                                          |
| <b>Biliary phospholipids (%<br/>of total biliary lipids, N:<br/>19-24%)</b> | Not available                                                                                                    | 14%                                                                            |
| <b>Evolution</b>                                                            | - Cirrhosis<br>- LT at 10 years old                                                                              | - Cirrhosis<br>- Normal LFT with UDCA treatment at 11 years old                |

UDCA : ursodeoxycholic acid, LFT : liver function tests, LT : liver transplantation.

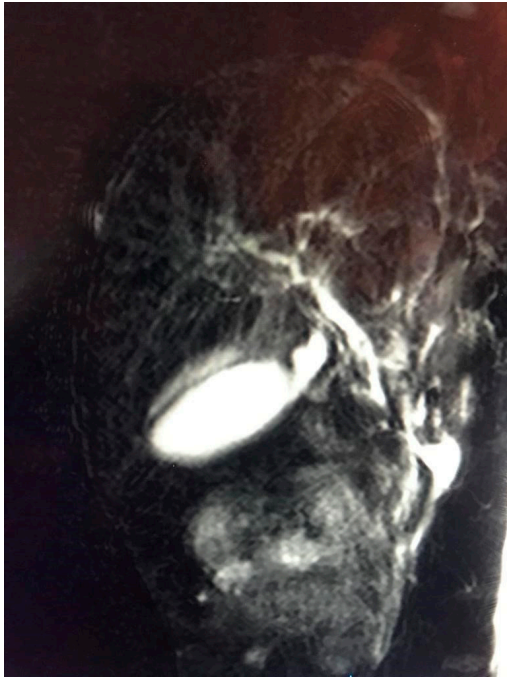

a

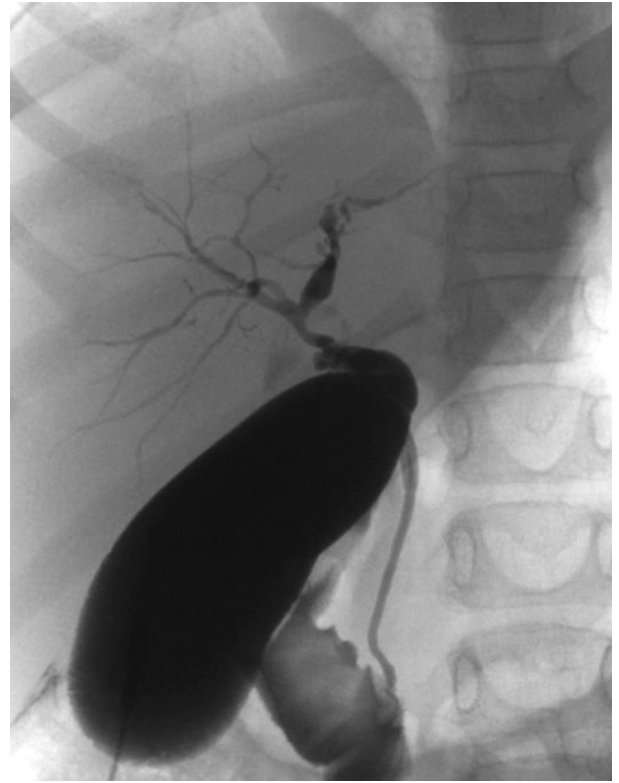

b

**Figure S2.** a: MRI-cholangiography in patient 188 with MDR3 deficiency (PFIC3). Cholangiogram showed changes in the intrahepatic bile ducts mimicking neonatal sclerosing cholangitis. b: Transhepatic cholecystography in an additional PFIC3 patient not included in the study. Cholangiogram showed changes in the intrahepatic bile ducts mimicking neonatal sclerosing cholangitis. These changes consisted of irregularities of the duct wall, filling defects, irregular dilation and rarefaction of small biliary branches.
